# Supplementary material for: The oxidation product (NO3−) of NO pollutant in flue gas used as a nitrogen source to improve microalgal biomass production and CO2 fixation
Source: Royal Society of Chemistry journal article supplement (doi:10.1039/c4ra05491a), 2014-01-01
Supplement: c4ra05491a1.pdf [file c4ra05491a1.pdf]

## Supplementary Information

### 1. Test data of CO<sub>2</sub> fixation efficiency of *Chlorella* PY-ZU1 under 15% CO<sub>2</sub>

| cultivation time<br>(Hour) | CO <sub>2</sub> fixation efficiency      |            |                 |
|----------------------------|------------------------------------------|------------|-----------------|
|                            | with nitrate from<br>500ppm NO oxidation | without NO | with 500 ppm NO |
| 0                          | 96.80                                    | 75.54      | 57.84           |
| 0.5                        | 92.80                                    | 81.46      | 77.04           |
| 1.5                        | 86.67                                    | 80.16      | 59.38           |
| 2                          | 77.87                                    | 67.79      | 37.26           |
| 3                          | 69.40                                    | 36.96      | 13.97           |
| 4                          | 66.60                                    | 22.77      | 9.26            |
| 5                          | 65.73                                    | 19.84      | 9.39            |
| 6                          | 54.93                                    | 20.23      | 10.60           |
| 7                          | 46.80                                    | 21.80      | 12.33           |
| 8                          | 37.00                                    | 23.16      | 14.27           |
| 9                          | 39.80                                    | 24.59      | 15.61           |
| 10                         | 49.67                                    | 26.09      | 16.82           |
| 11                         | 51.87                                    | 26.68      | 18.22           |
| 12                         | 52.87                                    | 27.07      | 19.91           |
| 13                         | 53.73                                    | 27.00      | 21.25           |
| 14                         | 54.53                                    | 26.61      | 22.24           |
| 15                         | 55.53                                    | 26.09      | 23.36           |
| 16                         | 55.80                                    | 26.28      | 23.99           |
| 17                         | 55.87                                    | 27.20      | 24.22           |
| 18                         | 58.20                                    | 27.59      | 24.44           |
| 19                         | 62.60                                    | 27.46      | 24.80           |
| 20                         | 65.27                                    | 27.72      | 25.13           |
| 21                         | 66.93                                    | 28.76      | 25.78           |
| 22                         | 68.33                                    | 29.86      | 26.92           |
| 23                         | 68.87                                    | 30.97      | 26.94           |
| 24                         | 69.07                                    | 31.23      | 26.25           |
| 25                         | 69.27                                    | 32.33      | 26.26           |
| 26                         | 69.00                                    | 32.20      | 26.13           |
| 27                         | 69.53                                    | 32.60      | 26.23           |
| 28                         | 69.60                                    | 32.87      | 26.18           |
| 29                         | 69.40                                    | 33.07      | 26.10           |
| 30                         | 67.87                                    | 33.00      | 26.08           |
| 31                         | 67.80                                    | 32.93      | 26.11           |
| 32                         | 67.53                                    | 32.73      | 26.34           |
| 33                         | 67.33                                    | 32.73      | 26.36           |

|    |       |       |       |
|----|-------|-------|-------|
| 34 | 66.93 | 32.53 | 25.86 |
| 35 | 66.67 | 32.27 | 25.20 |
| 36 | 66.67 | 31.53 | 25.12 |
| 37 | 66.80 | 30.47 | 25.07 |
| 38 | 67.67 | 29.67 | 24.95 |
| 39 | 67.27 | 29.13 | 24.58 |
| 40 | 66.87 | 28.87 | 24.80 |
| 41 | 66.73 | 28.53 | 24.27 |
| 42 | 64.60 | 27.87 | 23.37 |
| 43 | 65.20 | 27.13 | 22.19 |
| 44 | 65.27 | 25.87 | 20.52 |
| 45 | 64.80 | 26.20 | 19.84 |
| 46 | 64.80 | 26.07 | 19.75 |
| 47 | 64.60 | 26.33 | 19.92 |
| 48 | 65.00 | 26.13 | 20.00 |
| 49 | 64.67 | 39.13 | 19.84 |
| 50 | 65.00 | 28.07 | 19.84 |
| 51 | 66.07 | 24.93 | 20.08 |
| 52 | 65.80 | 24.67 | 19.96 |
| 53 | 65.67 | 24.87 | 20.31 |
| 54 | 65.67 | 24.93 | 20.27 |
| 55 | 65.73 | 24.73 | 20.35 |
| 56 | 65.47 | 24.47 | 20.48 |
| 57 | 65.40 | 24.00 | 19.91 |
| 58 | 65.27 | 23.40 | 19.85 |
| 59 | 64.60 | 22.87 | 19.65 |
| 60 | 64.53 | 22.20 | 18.85 |
| 61 | 64.40 | 21.73 | 18.42 |
| 62 | 64.53 | 20.87 | 18.20 |
| 63 | 64.20 | 20.60 | 17.81 |
| 64 | 63.87 | 19.27 | 17.66 |
| 65 | 63.67 | 19.33 | 17.26 |
| 66 | 63.20 | 19.80 | 16.83 |
| 67 | 63.20 | 19.40 | 16.45 |
| 68 | 62.60 | 19.47 | 16.19 |
| 69 | 62.87 | 19.27 | 15.88 |
| 70 | 62.60 | 18.80 | 15.29 |
| 71 | 62.60 | 18.73 | 14.96 |
| 72 | 62.93 | 18.73 | 14.85 |
| 73 | 62.53 | 18.80 | 14.72 |
| 74 | 61.93 | 31.53 | 14.74 |
| 75 | 62.27 | 21.13 | 14.66 |

|     |       |       |       |
|-----|-------|-------|-------|
| 76  | 62.27 | 18.33 | 14.91 |
| 77  | 61.40 | 18.47 | 13.83 |
| 78  | 61.27 | 18.47 | 13.05 |
| 79  | 60.40 | 18.53 | 12.63 |
| 80  | 60.07 | 18.40 | 12.37 |
| 81  | 59.93 | 18.20 | 12.19 |
| 82  | 59.47 | 17.80 | 12.07 |
| 83  | 58.93 | 17.40 | 11.81 |
| 84  | 58.20 | 17.07 | 11.63 |
| 85  | 57.87 | 16.40 | 11.30 |
| 86  | 57.73 | 15.80 | 11.24 |
| 87  | 57.60 | 15.33 | 10.92 |
| 88  | 56.80 | 14.67 | 10.59 |
| 89  | 56.67 | 14.53 | 10.16 |
| 90  | 55.67 | 14.93 | 9.56  |
| 91  | 54.80 | 15.00 | 9.08  |
| 92  | 54.33 | 14.20 | 8.54  |
| 93  | 55.00 | 13.80 | 8.01  |
| 94  | 55.60 | 13.40 | 8.27  |
| 95  | 55.87 | 13.80 | 8.00  |
| 96  | 55.67 | 13.73 | 8.08  |
| 97  | 55.87 | 44.53 | 8.22  |
| 98  | 55.73 | 23.53 | 7.96  |
| 99  | 55.20 | 14.80 | 8.11  |
| 100 | 53.27 | 12.93 | 8.24  |
| 101 | 53.73 | 13.00 | 8.71  |
| 102 | 53.67 | 13.47 | 8.12  |
| 103 | 53.60 | 13.53 | 7.99  |
| 104 | 53.20 | 13.47 | 7.64  |
| 105 | 53.00 | 13.67 | 7.37  |
| 106 | 52.60 | 13.67 | 7.02  |
| 107 | 52.47 | 13.33 | 6.82  |
| 108 | 51.93 | 13.07 | 6.75  |
| 109 | 51.80 | 12.80 | 6.48  |
| 110 | 51.60 | 12.53 | 5.95  |
| 111 | 50.93 | 12.60 | 5.83  |
| 112 | 50.60 | 12.07 | 5.50  |
| 113 | 50.40 | 12.33 | 5.04  |
| 114 | 48.67 | 12.67 | 4.65  |
| 115 | 48.53 | 12.87 | 4.52  |
| 116 | 48.80 | 12.80 | 3.92  |
| 117 | 47.80 | 12.73 | 3.26  |

|     |       |       |      |
|-----|-------|-------|------|
| 118 | 47.67 | 12.67 | 3.93 |
| 119 | 47.13 | 12.80 | 4.45 |
| 120 | 46.67 | 12.80 | 4.64 |
| 121 | 46.20 | 12.47 | 5.57 |
| 122 | 45.73 | 26.13 | 4.83 |
| 123 | 45.60 | 14.27 | 4.90 |
| 124 | 43.67 | 11.40 | 4.89 |
| 125 | 44.73 | 11.27 | 5.09 |
| 126 | 44.73 | 11.60 | 4.84 |
| 127 | 45.40 | 11.67 | 4.44 |
| 128 | 45.47 | 11.33 | 4.25 |
| 129 | 45.73 | 11.20 | 4.19 |
| 130 | 45.27 | 11.20 | 3.72 |
| 131 | 44.60 | 10.87 | 3.59 |
| 132 | 44.33 | 10.40 | 3.33 |
| 133 | 44.20 | 9.80  | 3.26 |
| 134 | 43.87 | 9.20  | 2.92 |
| 135 | 43.93 | 8.80  | 2.59 |
| 136 | 43.80 | 8.07  | 2.32 |
| 137 | 43.13 | 7.93  | 1.92 |
| 138 | 43.27 | 8.33  | 1.46 |
| 139 | 43.33 | 8.00  | 1.06 |
| 140 | 42.60 | 7.93  | 0.73 |
| 141 | 42.53 | 7.93  | 0.20 |
| 142 | 42.73 | 8.00  | 0.20 |
| 143 | 42.33 | 7.47  | 1.26 |
| 144 | 42.47 | 6.80  | 1.99 |
| 145 | 42.53 | 11.07 | 1.46 |
| 146 | 42.40 | 6.53  |      |
| 147 | 41.87 | 5.60  |      |
| 148 | 41.80 | 5.93  |      |
| 149 | 41.87 | 5.53  |      |
| 150 | 40.93 | 5.80  |      |
| 151 | 41.53 | 5.47  |      |
| 152 | 41.67 | 5.20  |      |
| 153 | 42.27 | 5.07  |      |
| 154 | 42.33 | 5.07  |      |
| 155 | 41.87 | 4.27  |      |
| 156 | 41.73 | 4.13  |      |
| 157 | 40.93 | 3.47  |      |
| 158 | 40.07 | 3.07  |      |
| 159 | 40.27 | 2.80  |      |

|     |       |      |  |
|-----|-------|------|--|
| 160 | 39.73 | 2.60 |  |
| 161 | 38.80 | 3.40 |  |
| 162 | 38.67 | 3.20 |  |
| 163 | 38.53 | 3.47 |  |
| 164 | 37.87 | 2.80 |  |
| 165 | 37.53 | 2.47 |  |
| 166 | 37.67 | 2.60 |  |
| 167 | 37.27 | 3.13 |  |
| 168 | 37.73 | 3.33 |  |
| 169 | 37.27 | 6.67 |  |
| 170 | 37.40 | 3.53 |  |

**2. Mean value of experimental data and standard errors of CO<sub>2</sub> fixation efficiency of *Chlorella* PY-ZU1 under 15% CO<sub>2</sub>**

| cultivation time<br>(Hour) | CO <sub>2</sub> fixation efficiency      |      |            |      |                 |       |
|----------------------------|------------------------------------------|------|------------|------|-----------------|-------|
|                            | with nitrate from<br>500ppm NO oxidation |      | without NO |      | with 500 ppm NO |       |
|                            | Mean                                     | SD   | Mean       | SD   | Mean            | SD    |
| 1                          | 86.67                                    | 2.17 | 81.46      | 2.40 | 59.38           | 10.67 |
| 3                          | 69.40                                    | 1.34 | 36.96      | 1.09 | 37.26           | 0.74  |
| 11                         | 51.87                                    | 1.76 | 25.28      | 0.74 | 18.22           | 1.54  |
| 20                         | 65.27                                    | 2.43 | 29.29      | 0.86 | 25.13           | 1.13  |
| 28                         | 69.60                                    | 2.21 | 32.73      | 1.88 | 26.18           | 0.55  |
| 40                         | 66.87                                    | 1.48 | 28.98      | 1.14 | 24.80           | 1.02  |
| 59                         | 64.60                                    | 2.17 | 22.59      | 0.89 | 19.65           | 1.02  |
| 72                         | 62.93                                    | 1.76 | 18.78      | 0.84 | 14.85           | 0.94  |
| 96                         | 55.67                                    | 1.44 | 13.63      | 0.55 | 8.08            | 0.65  |
| 120                        | 46.67                                    | 1.36 | 12.30      | 0.14 | 4.64            | 0.70  |
| 144                        | 42.47                                    | 1.58 | 6.74       | 0.09 | 1.99            | 0.38  |
| 168                        | 37.73                                    | 1.45 | 2.46       | 0.03 |                 |       |
